# Supplementary material for: Robust nanotube-based nanosensor designed for the detection of explosive molecules
Source: Royal Society of Chemistry journal article supplement (doi:10.1039/d4na00166d), 2024-01-01
Supplement: d4na00166d1.pdf [file d4na00166d1.pdf]

## Supplementary Information

### Robust nanotube-based nanosensor designed for the detection of explosive molecules

Laith A. Algharagholy<sup>1</sup>, Víctor Manuel García-Suárez<sup>2\*</sup>, Kareem Hasan Bardan<sup>1</sup>

<sup>1</sup>Department of Physics, College of Science, University of Sumer, Al Riffae, Zip: 64005, Thi-Qar, Iraq.

<sup>2</sup>Departamento de Física, Universidad de Oviedo & CINN (CSIC), Oviedo, 33007, Spain.

\* Corresponding author: [vm.garcia@cinn.es](mailto:vm.garcia@cinn.es)

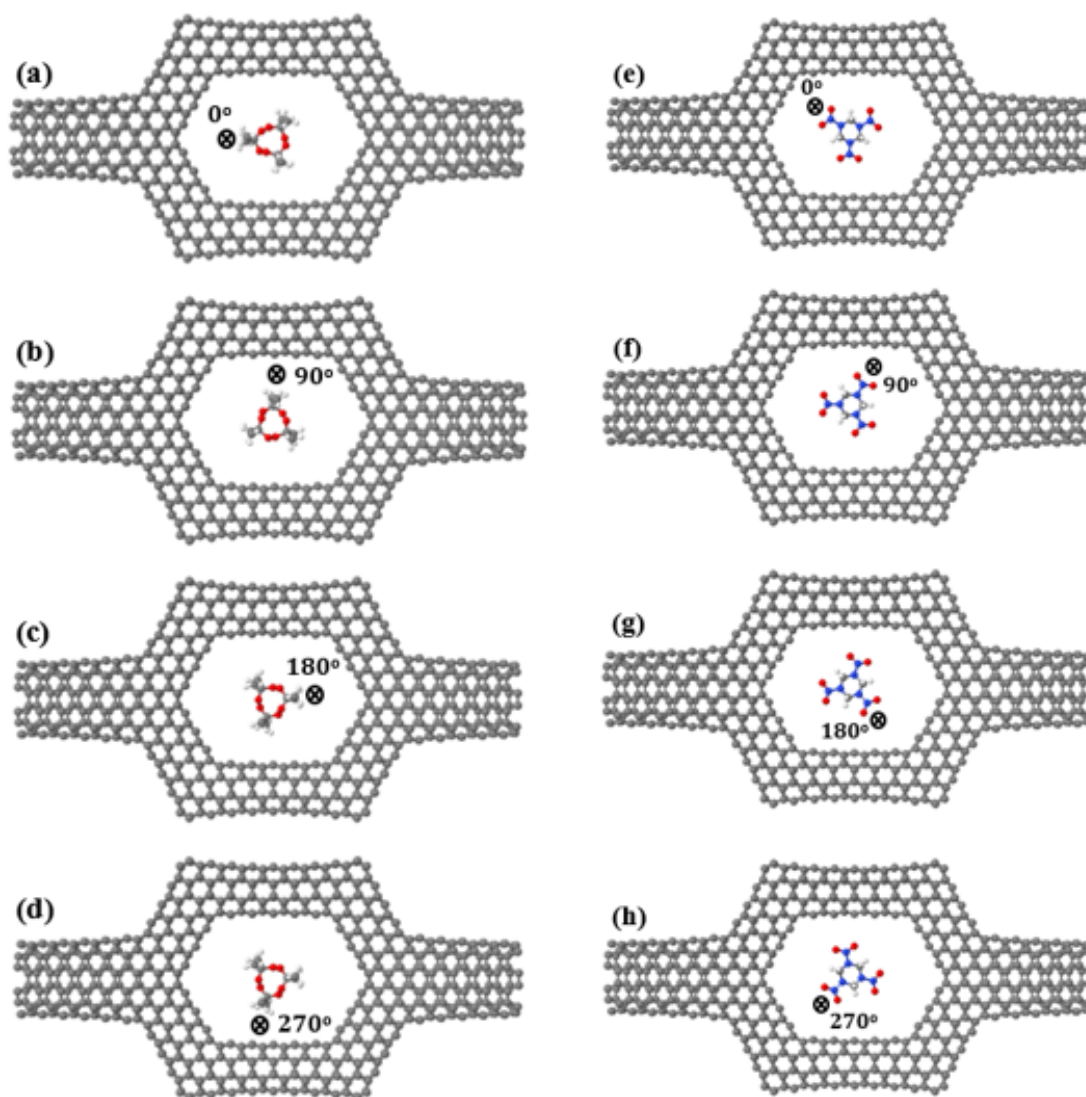

**Figure S1:** (a-d) Relaxed *Tor*+TATP with 0°, 90°, 180°, and 270°, respectively, and (e-h) Relaxed *Tor*+RDX with 0°, 90°, 180°, and 270°, respectively. In all subfigures, the circle with the diagonal cross symbol denotes the angle of orientation.

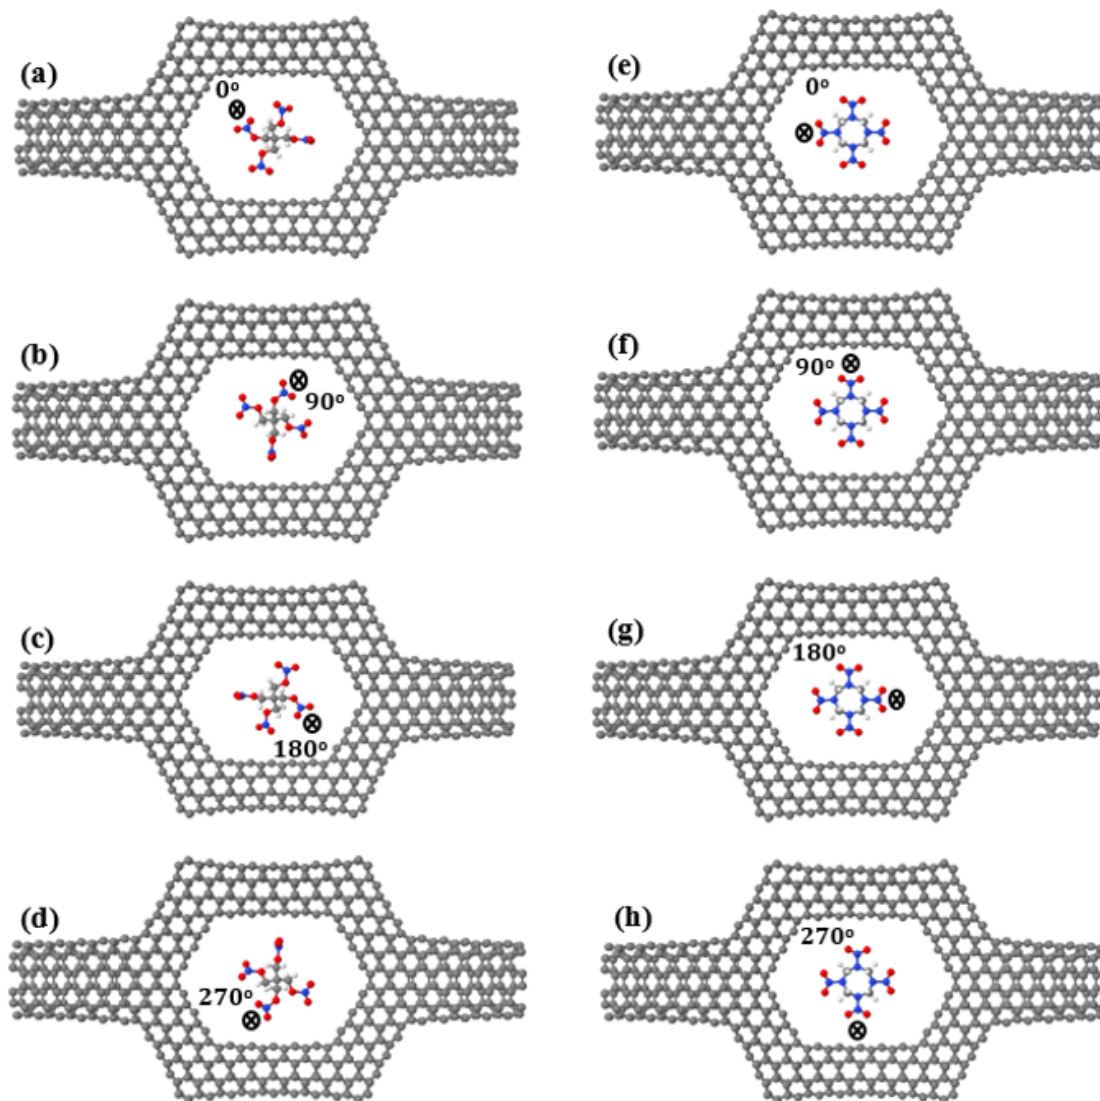

**Figure S2:** (a-d) Relaxed *Tor*+PENT with 0°, 90°, 180°, and 270°, respectively, and (e-h) Relaxed *Tor*+HMX with 0°, 90°, 180°, and 270°, respectively. In all subfigures, the circle with the diagonal cross symbol denotes the angle of orientation.

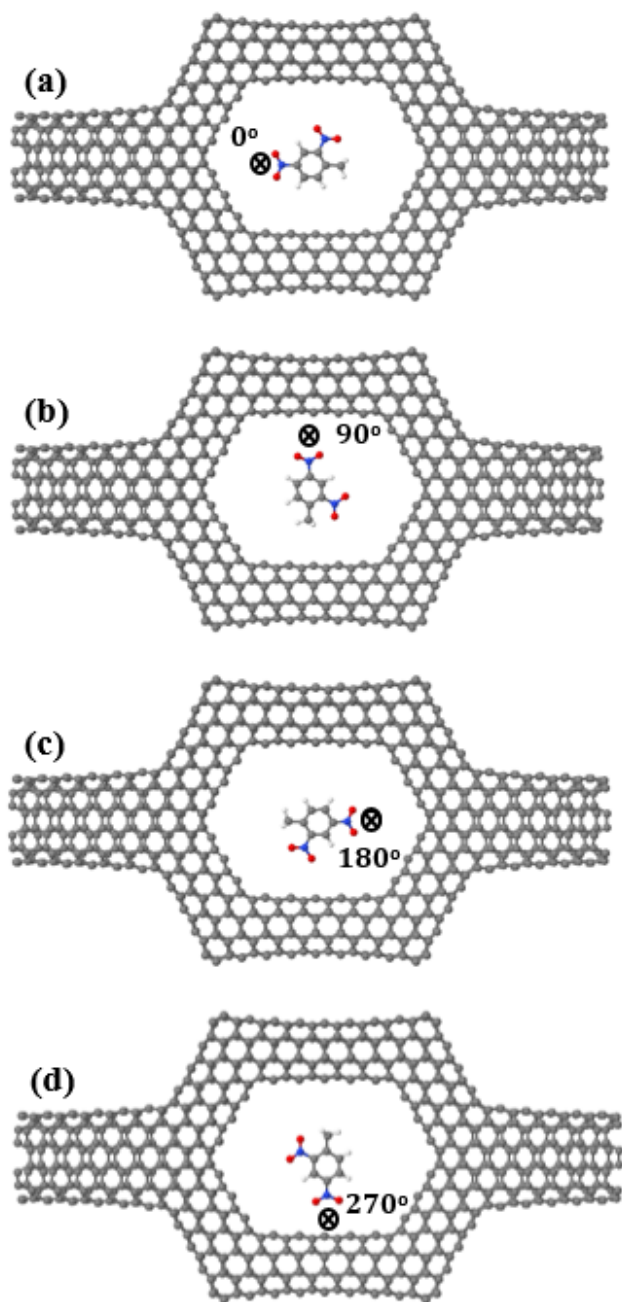

**Figure S3:** (a-d) Relaxed *Tor*+DNT with 0°, 90°, 180°, and 270°, respectively. In all subfigures, the circle with the diagonal cross symbol denotes the angle of orientation.

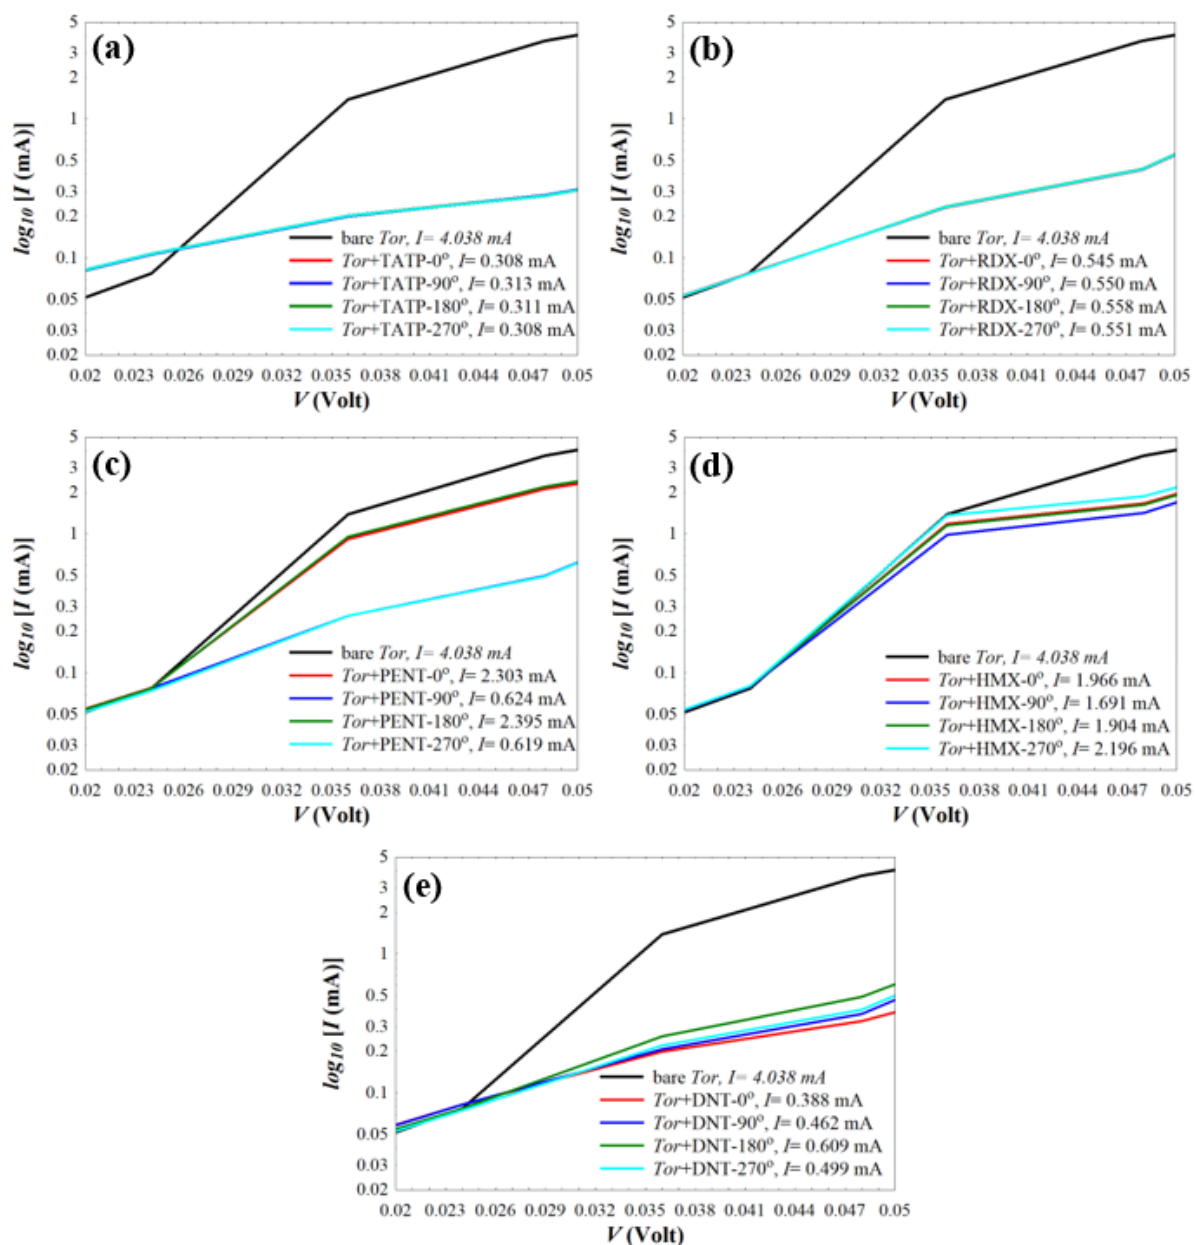

**Figure S4: (a-e)** Current ( $I$ ) of the bare *Tor*, *Tor* +TATP, *Tor* +RDX, *Tor* +PENT, *Tor* +HMX, and *Tor*+DNT respectively. Each explosive molecule rotates with four angles of orientation inside the hollow region of the *Tor* (0°, 90°, 180°, and 270°).

**Table S1:** Distance between the inner walls of the nanopore and the closest atoms (H and O) of the explosive molecules at each orientation angle.

| <i>Tor</i> | Distance in angstrom (Å) |            |            |           |
|------------|--------------------------|------------|------------|-----------|
|            | Upper edge               | Lower edge | Right edge | Left edge |
| +TATP-0°   | H= 4.84                  | H= 4.41    | H= 7.57    | H= 7.15   |
| +TATP-90°  | H= 4.97                  | H= 4.52    | H= 7.36    | H= 6.99   |
| +TATP-180° | H= 4.80                  | H= 4.12    | H= 7.38    | H= 7.29   |
| +TATP-270° | H= 4.68                  | H= 4.13    | H= 7.84    | H= 7.27   |
| +RDX-0°    | H= 4.99                  | H= 6.87    | H= 8.73    | H= 7.87   |
|            | O= 4.64                  | O= 4.86    | O= 7.35    | O= 7.57   |
| +RDX-90°   | H= 5.32                  | H= 6.13    | H= 8.36    | H= 8.76   |
|            | O= 3.95                  | O= 4.70    | O= 7.14    | O= 6.70   |
| +RDX-180°  | H= 5.73                  | H= 6.13    | H= 8.36    | H= 8.27   |
|            | O= 3.96                  | O= 5.20    | O= 7.55    | O= 6.93   |
| +RDX-270°  | H= 6.27                  | H= 5.69    | H= 9.00    | H= 7.67   |
|            | O= 4.05                  | O= 4.97    | O= 7.26    | O= 6.76   |
| +PENT-0°   | H= 5.72                  | H= 5.64    | H= 8.44    | H= 9.70   |
|            | O= 4.15                  | O= 3.97    | O= 5.99    | O= 6.30   |
| +PENT-90°  | H= 6.84                  | H= 6.79    | H= 8.13    | H= 8.50   |
|            | O= 3.70                  | O= 3.51    | O= 6.53    | O= 6.57   |
| +PENT-180° | H= 5.51                  | H= 6.13    | H= 9.16    | H= 9.01   |
|            | O= 3.92                  | O= 4.24    | O= 5.74    | O= 6.54   |
| +PENT-270° | H= 6.10                  | H= 7.00    | H= 7.94    | H= 8.70   |
|            | O= 4.44                  | O= 3.43    | O= 6.03    | O= 7.03   |
| +HMX-0°    | H= 5.67                  | H= 5.57    | H= 8.56    | H= 8.03   |
|            | O= 4.13                  | O= 3.97    | O= 6.84    | O= 6.23   |
| +HMX-90°   | H= 5.72                  | H= 5.55    | H= 8.57    | H= 8.00   |
|            | O= 3.93                  | O= 3.97    | O= 6.90    | O= 6.27   |
| +HMX-180°  | H= 5.69                  | H= 5.56    | H= 8.56    | H= 8.01   |
|            | O= 4.10                  | O= 4.06    | O= 6.73    | O= 6.23   |
| +HMX-270°  | H= 5.70                  | H= 5.55    | H= 8.58    | H= 7.99   |
|            | O= 4.07                  | O= 3.97    | O= 6.92    | O= 6.31   |
| +DNT-0°    | H= 6.38                  | H= 4.78    | H= 6.56    | H= 8.36   |
|            | O= 4.94                  | O= 5.72    | O= 8.17    | O= 6.51   |
| +DNT-90°   | H= 6.57                  | H= 4.15    | H= 8.56    | H= 7.76   |
|            | O= 4.45                  | O= 4.94    | O= 7.21    | O= 7.50   |
| +DNT-180°  | H= 6.13                  | H= 5.84    | H= 8.55    | H= 7.42   |
|            | O= 6.76                  | O= 3.97    | O= 6.58    | O= 6.81   |
| +DNT-270°  | H= 5.11                  | H= 5.59    | H= 7.73    | H= 7.31   |
|            | O= 5.92                  | O= 3.74    | O= 7.70    | O= 7.16   |

**Table S2:** Calculated currents at 0.05 V for all molecules inside the nanopore.

| <i>Tor</i> | <i>I</i> (mA) | <i>Tor</i> | <i>I</i> (mA) | <i>Tor</i> | <i>I</i> (mA) | <i>Tor</i> | <i>I</i> (mA) |
|------------|---------------|------------|---------------|------------|---------------|------------|---------------|
| +TATP-0°   | 0.308         | +TATP-90°  | 0.313         | +TATP-180° | 0.311         | +TATP-270° | 0.308         |
| +RDX-0°    | 0.545         | +RDX-90°   | 0.550         | +RDX-180°  | 0.558         | +RDX-270°  | 0.551         |
| +PENT-0°   | 2.303         | +PENT-90°  | 0.642         | +PENT-180° | 2.395         | +PENT-270° | 0.619         |
| +HMX-0°    | 1.904         | +HMX-90°   | 1.691         | +HMX-180°  | 1.904         | +HMX-270°  | 2.196         |
| +DNT-0°    | 0.388         | +DNT-90°   | 0.462         | +DNT-180°  | 0.609         | +DNT-270°  | 0.499         |
